# Supplementary material for: Deficiency of mDia, an Actin Nucleator, Disrupts Integrity of Neuroepithelium and Causes Periventricular Dysplasia
Source: PubMed Central journal article supplement (PMC3182227; doi:10.1371/journal.pone.0025465), 2011-09-28
Supplement: pone.0025465.s005.pdf [file pone.0025465.s005.pdf]

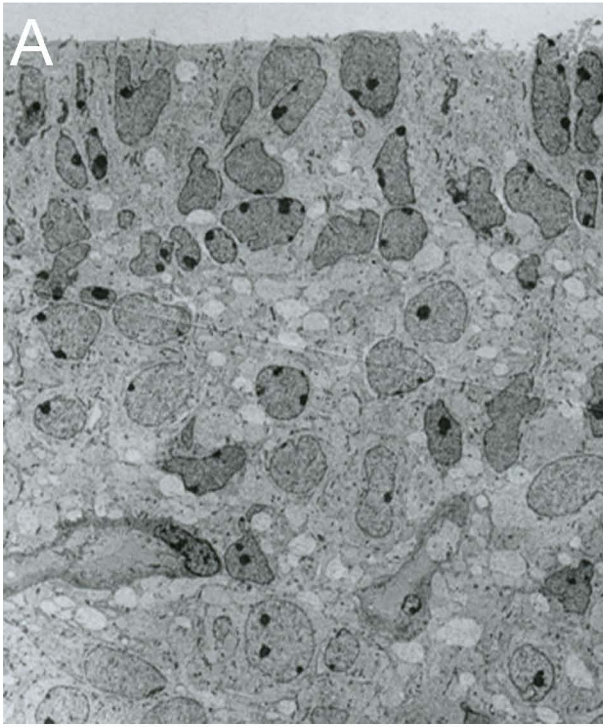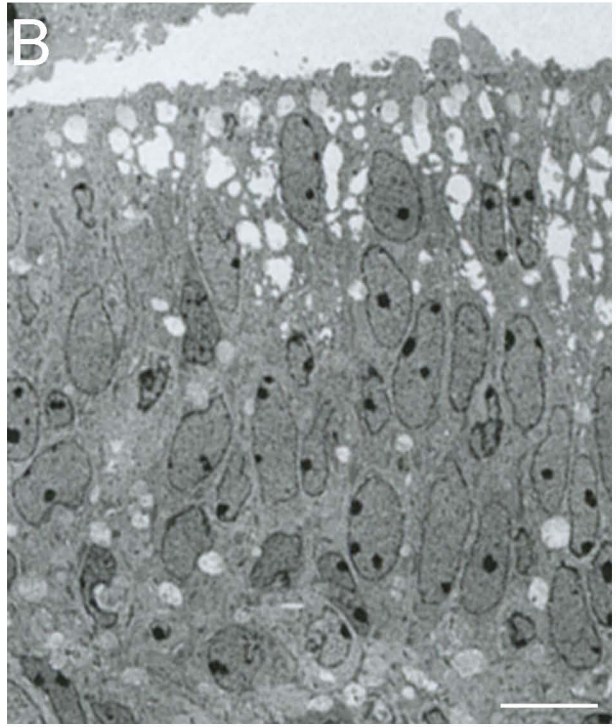

**Figure S5**
